# Supplementary material for: Risk Factors of Patient-Related Safety Events during Active Mobilization for Intubated Patients in Intensive Care Units—A Multi-Center Retrospective Observational Study
Source: MDPI journal article supplement (doi:10.3390/jcm10122607), 2021-06-13
Supplement: s1 [file jcm-1234625-proofed-supplementary.pdf › jcm-1234625-proofed-supplementary.pdf]

Table S1. Hospital background information.

| Facility Name             | A      | B         | C         | D      | E      | F    | G        | H    | I         |
|---------------------------|--------|-----------|-----------|--------|--------|------|----------|------|-----------|
| Number of beds            | 868    | 740       | 740       | 592    | 500    | 464  | 464      | 415  | 376       |
| Number of ICU beds        | 20     | 26        | 8         | 12     | 6      | 24   | 8        | 8    | 10        |
| ICU system                | Closed | Mandatory | Mandatory | Closed | Closed | Open | Elective | Open | Mandatory |
| Patient-to-nurse ratio    | 2:1    | 2:1       | 2:1       | 1:1    | 2:1    | 2:1  | 2:1      | 2:1  | 2:1       |
| Dedicated physiotherapist | Yes    | Yes       | Yes       | No     | No     | No   | Yes      | Yes  | No        |
| Mobilization protocol     | Yes    | Yes       | Yes       | Yes    | Yes    | Yes  | Yes      | Yes  | Yes       |
| Sedation protocol         | No     | Yes       | No        | No     | No     | No   | Yes      | No   | No        |
| Agitation protocol        | No     | Yes       | No        | No     | No     | No   | No       | No   | No        |
| SAT/SBT protocol          | Yes    | Yes       | Yes       | No     | No     | No   | Yes      | No   | Yes       |

Closed: intensivist decides therapeutic policy; Mandatory: intensivist is involved in deciding treatment policy; Elective: intensivist is mainly involved as a consultant; Open: physicians in each department decide therapeutic policy [1].

Table S2. Mobilization protocol [2].

|                                                                                                                |                                                                                                                                                                                                                                                            |
|----------------------------------------------------------------------------------------------------------------|------------------------------------------------------------------------------------------------------------------------------------------------------------------------------------------------------------------------------------------------------------|
| <div>Level 1</div> <div></div> | <div>Respiratory</div> <div><div><input type="checkbox"/> Turning</div><div><input type="checkbox"/> RHOB ≤ 45 degrees</div><div><input type="checkbox"/> Passive ROM exercise</div><div><input type="checkbox"/> Respiratory physical therapy</div></div> |
|----------------------------------------------------------------------------------------------------------------|------------------------------------------------------------------------------------------------------------------------------------------------------------------------------------------------------------------------------------------------------------|

Table S3. The study management committee.

## The Study Management Committee

◆ **Fukuyama City Hospital**

- Yoshiyuki Teranobu
- Shuhei Ikeguchi

◆ **Hiroshima University Hospital**

- Shunsuke Taito

◆ **Japanese Red Cross Ishinomaki Hospital**

- Shuntaro Suzuki

◆ **Japanese Red Cross Maebashi Hospital**

- Kenji Fujizuka
- Takeshi Mizuno
- Kei Tsunoda
- Emi Abe

◆ **Japanese Red Cross Nagaoka Hospital**

- Tomoaki Terasawa

◆ **Japanese Society for Early Mobilization**

- Sho Iida
- Tomoya Kuroda

◆ **Nagasaki University**

- Tsubasa Watanabe

◆ **Naha City Hospital**

- Takuya Tonaki
- Shinya Kawabata
- Yoshifumi Heshiki
- Yousuke Sato
- Hiroshi Tomiyama
- Yuji Miyata

◆ **National Hospital Organization  
Nagoya Medical Center**

- Mika Ohno
- Yayoi Honjyo

◆ **Showa University School of Medicine**

- Fumihito Kasai
- Maiko Mori
- Hiroko Kato
- Kota Kubodera
- Kaori Tsuruta

◆ **Tokyo Women's Medical University**

- Tetsuo Ikai
- Tatsuya Horibe
- Gen Kudo
- Masako Shimada
- Syouhei Yokota
- Naoko Shima

◆ **Yao Tokushukai General Hospital**

- Hiromasa Harada
- Yasuko Muranaka

◆ **Yuuai Medical Center**

- Masahiro Tamashiro
- Shohei Miyazato
- Shogo Sakihama
- Ryo Nagato

Reference

1. Pronovost, P.J.; Angus, D.C.; Dorman, T.; Robinson, K.A.; Dremsizov, T.T.; Young, T.L. Physician staffing patterns and clinical outcomes in critically ill patients: A systematic review. *JAMA* **2002**, *288*, 2151–2162.

2. Watanabe, S.; Kotani, T.; Taito, S.; Ota, K.; Ishii, K.; Ono, M.; Katsukawa, H.; Kozu, R.; Morita, Y.; Arakawa, R.; et al. Determinants of gait independence after mechanical ventilation in the intensive care unit: A Japanese multicenter retrospective exploratory cohort study. *J. Intensive Care* **2019**, *7*, 53.
